# Supplementary material for: A sulfur-containing two-dimensional covalent organic framework with electrocatalytic hydrogen evolution in alkaline medium
Source: Royal Society of Chemistry journal article supplement (doi:10.1039/d2ce00966h), 2022-01-01
Supplement: d2ce00966h1.pdf [file d2ce00966h1.pdf]

## Supporting Information

### **A sulfur-containing two-dimensional covalent organic framework with electrocatalytic hydrogen evolution in alkaline medium**

Yunchao Ma<sup>a,b,†</sup>, Yue Fu<sup>a,b,†</sup>, Yuhang Han<sup>a,b</sup>, Jingyang Li<sup>a</sup>, Wei Jiang<sup>a</sup>, Yang Lu<sup>c</sup>, Chunbo Liu<sup>\*a</sup>,  
Guangbo Che<sup>\*a,d</sup> and Bo Hu<sup>\*b</sup>

<sup>a</sup> *Key Laboratory of Preparation and Application of Environmental Friendly Materials (Jilin Normal University), Ministry of Education, Changchun, 130103, P.R. China*

<sup>b</sup> *College of Chemistry, Jilin Normal University, Siping, 136000, P.R. China*

<sup>c</sup> *College of Mathematics and Computer, Jilin Normal University, Siping, 136000, P.R. China*

<sup>d</sup> *Baicheng Normal University, Baicheng, 137000, P.R. China*

## Table of contents

|                   |                                                        |       |
|-------------------|--------------------------------------------------------|-------|
| <b>Section S1</b> | Materials and characterization                         | S3-S5 |
| <b>Section S2</b> | Gas adsorption isotherms                               | S6    |
| <b>Section S3</b> | Thermogravimetric Analysis                             | S7    |
| <b>Section S4</b> | Stability test                                         | S8    |
| <b>Section S5</b> | Unit cell parameters and fractional atomic coordinates | S9    |
| <b>Section S6</b> | References                                             | S10   |

## Section S1. Materials and characterization

### S1.1 Materials and instruments

All starting materials and solvents, unless otherwise noted, were obtained from J&K scientific LTD. Fourier transform infrared (FT-IR) spectra were acquired on a Thermoscientific Nicolet 4700 Fourier Transform Infrared Spectrometer with KBr pellet. Thermogravimetric analysis (TGA) was recorded on a STA 449 F3 *Jupiter* thermal analyzer with N<sub>2</sub> flow rate of 20 mL min<sup>-1</sup> at a heating rate of 5 °C min<sup>-1</sup> to 800 °C. PXRD data were collected on a PANalytical B.V. Empyrean powder diffractometer using a Cu K $\alpha$  source ( $\lambda = 1.5418 \text{ \AA}$ ) over the range of  $2\theta = 2.0\text{--}40.0^\circ$  with a step size of  $0.02^\circ$  and 2 s per step. The sorption isotherm for N<sub>2</sub> was measured by Micromeritics ASAP 2460 analyzer with ultra-high-purity gas (99.99% purity). To estimate the pore size distributions, nonlocal density functional theory (NLDFT) was applied to analyze the N<sub>2</sub> isotherm on the basis of the model of N<sub>2</sub>@77K on carbon with slit pores and the method of non-negative regularization. The SEM images were obtained on JEOL 8100 scanning electron microscope. X-ray photoelectron spectroscopy (XPS) was obtained by Escalab 250XI X-ray electron spectrometer (VG Scientific, America).

### S1.2 Electrochemical measurements

The electrocatalytic properties of the catalysts for hydrogen evolution reaction were evaluated with a three-electrode configuration on a CHI 760E electrochemical workstation (CHI Instruments, Shanghai, China). To prepare the working electrode, 2 mg of the electrocatalyst combined with 300  $\mu\text{L}$  of ethanol and 4  $\mu\text{L}$  of Nafion was treated by ultrasonication for 20 min. Then, the as-prepared suspension (12  $\mu\text{L}$ , corresponding to a mass loading of  $1.14 \text{ mg cm}^{-2}$ ) was slowly deposited on glassy carbon (GC, 3 mm diameter) electrode. After continuous purging with N<sub>2</sub> to remove dissolved gases, 1.0 M KOH solutions was used as alkaline electrolytes. The as-prepared sample was directly used as the working electrode. Hg/HgO and graphite rods were used as reference and counter electrodes in 1.0 M KOH solutions. Potential measurements were all converted to potential values relative to the reversible hydrogen electrode (RHE) based on  $E_{(\text{vs. RHE})} = E_{(\text{vs. Hg/HgO})} + 0.0591 \cdot \text{pH} + 0.098$ . LSV curves were obtained in a nitrogen-saturated

electrolyte at a sweep rate of 10 mV/s. The ohmic potential drop ( $iR$ ) losses that arise from the solution resistance were all corrected. The EIS was tested in the constant potential mode in the frequency range 1 Hz to 100 kHz. Cyclic voltammetry (CV) curves of the samples in different electrolytes were tested at different scan rates (20, 40, 60, 80 and 100 mV/s) and further calculated to obtain the bilayer capacitance value  $C_{dl}$ .

### S1.3 The HER reaction process

In alkaline medium, the HER reaction process is assigned to the Volmer-Heyrovsky pathway<sup>[1,2]</sup>.

Electrochemical reaction step:

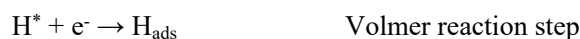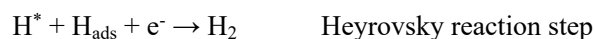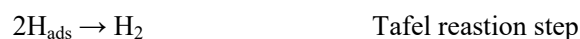

Where  $H^*$  represents the catalytic site with an adsorbed H-species.

### S1.4 The Tafel equation is presented as:

$$\eta = a + b \log(i/i_0)$$

$\eta$  is the overpotential,  $i$  is current density,  $i_0$  is the exchange current density,  $b$  is the Tafel slope and  $a$  is the constant term.

### S1.5 Double layer capacitance ( $C_{dl}$ ) calculation:

The double layer capacitance ( $C_{dl}$ ) was evaluated according to the following equation:  $C_{dl} = \Delta j/v$ , which  $\Delta j$  is the current density difference between anode and cathode at the potential corresponding to 0.25 V and  $v$  is the scan rate. The slope of the line plots corresponds to the double of  $C_{dl}$ .

### S1.6 Faraday efficiency calculation:

$$\text{The Faraday efficiency calculation: } FE\% = \frac{(\text{Amount of } H_2 \text{ generated experimentally})}{(\text{Amount of } H_2 \text{ generated theoretically})} = \frac{nNF}{Q} \times 100\%$$

Where  $n$  equals to 2,  $N$  is the number of Hydrogen produced during the experiment (mol) and  $Q$  is the total charge passed through the reaction.

### S1.7 Synthesis of JLNU-300

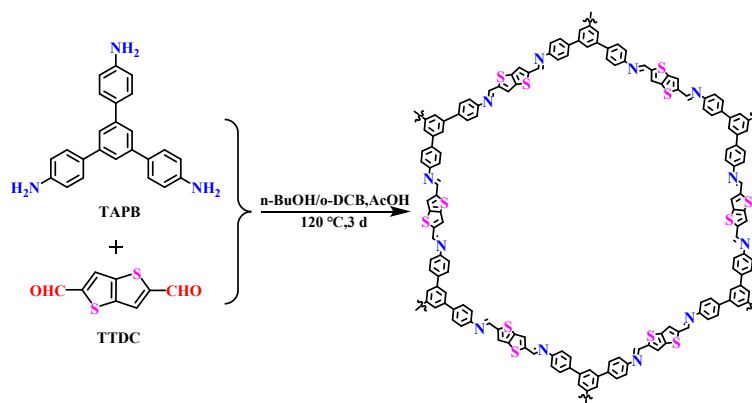

1,3,5-Tris(4-aminophenyl) benzene (TAPB) (0.04 mmol, 14.06 mg) and Thieno[3,2-b]thiophene-2,5-dicarboxaldehyde (TTDC) (0.06 mmol, 11.78 mg) were weighted into a Pyrex tube (volume: *ca* 20 ml with both length of 10 cm, neck length of 9 cm) Butanol (0.75 ml), 1,2-dichlorobenzene (0.25 ml) and 0.1 ml of aqueous acetic acid (6.0 mol/L) was added to the mixture. The tube was flash frozen at 77 K (LN<sub>2</sub> bath), evacuated to an internal pressure of 0.15 mmHg and flame sealed. Upon sealing the length of the tube was reduced to *ca.* 13 cm. The reaction mixture was heated at 120 °C for 72 h to afford a orange precipitate which was isolated by filtration over a medium glass frit and washed with anhydrous acetone (3 × 20 ml). The yield is about 71.0% (18.3 mg). The solvent was removed under vacuum at 80 °C to afford the corresponding products as orange powder of JLNU-300. Anal. Calcd for C<sub>72</sub>H<sub>42</sub>N<sub>6</sub>S<sub>6</sub>: C: 73.10; H: 3.55; N:7.11; S: 16.24. Found: C:72.98; H: 3.54; N: 7.09; S: 16.39. Solid-state <sup>13</sup>C NMR (500MHz): 103.107, 116.58, 122.64, 126.77, 141.82, 148.00 ppm. FT-IR (KBr): 3316, 3223, 1660, 1578, 1480, 1408, 1220, 1146, 870, 832 cm<sup>-1</sup>.

## Section S2: Gas adsorption isotherms

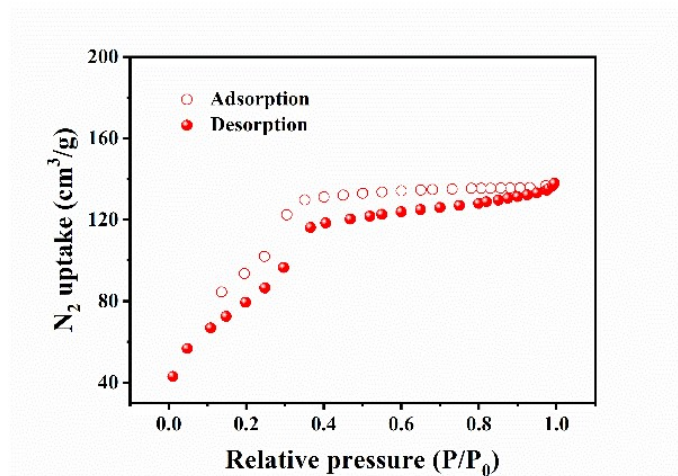

**Figure S1.** N<sub>2</sub> adsorption-desorption isotherms of JLNU-300.

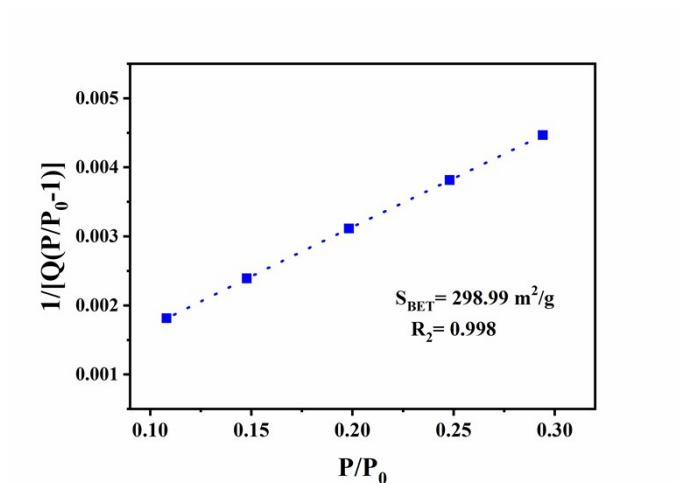

**Figure S2.** BET pole of JLNU-300 calculated from N<sub>2</sub> adsorption isotherm at 77 K.

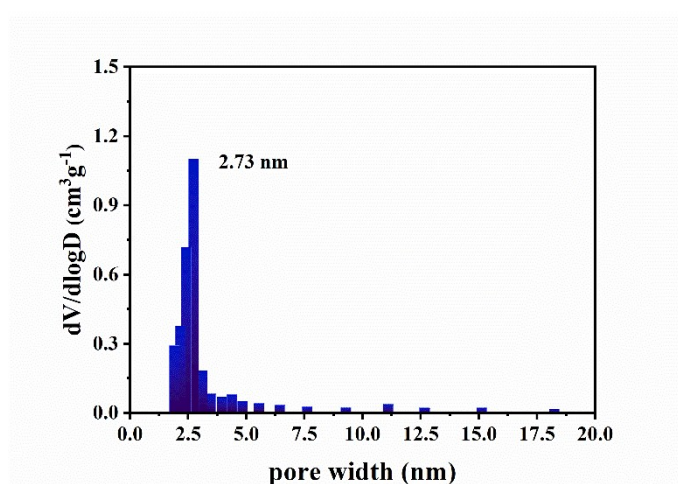

**Figure S3.** The pore size distribution curve of JLNU-300.

### Section S3: TGA

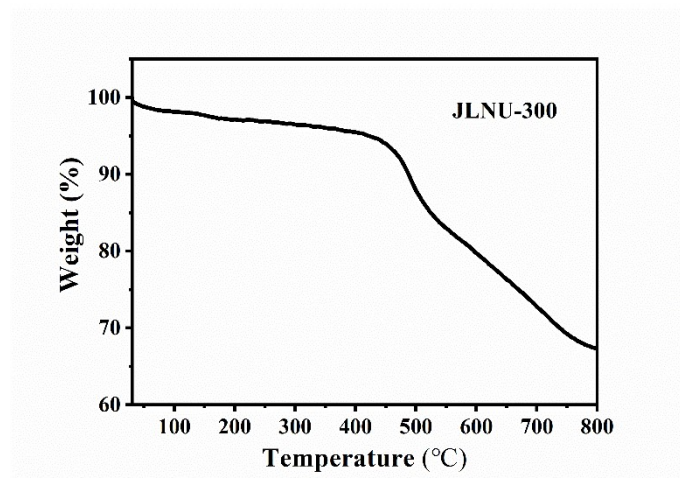

**Figure S4.** Thermogravimetric curves of JLNU-300 in N<sub>2</sub> atmosphere.

## Section S4: Stability test

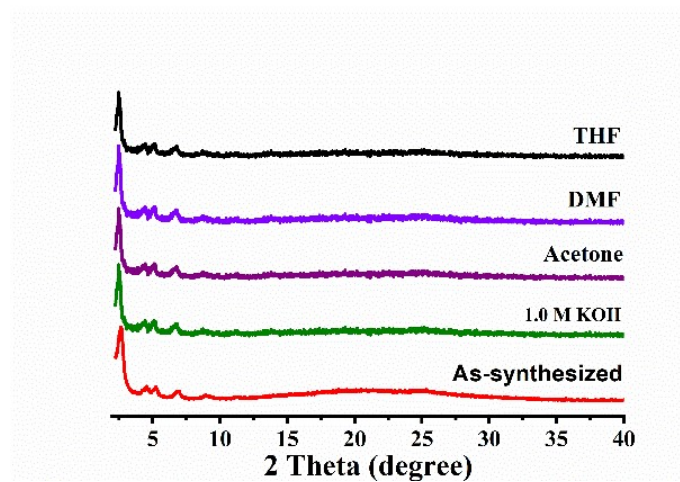

**Figure S5.** PXRD patterns of JLNU-300 after 3 d treatment in different organic solvents and 1.0 M KOH solutions.

## Section S5: Unit cell parameters and fractional atomic coordinates

**Table S1.** Unit cell parameters and fractional atomic coordinates for JLNU-300 were calculated on the basis of staggered **hcb** net.

| Space group          |         | <i>P</i> 6 (No. 168)                                                                                           |       |
|----------------------|---------|----------------------------------------------------------------------------------------------------------------|-------|
| Calculated unit cell |         | $a = b = 39.9266 \text{ \AA}$ , $c = 3.5538 \text{ \AA}$ ,<br>$\alpha = \beta = 90^\circ$ $\gamma = 120^\circ$ |       |
| Measured unit cell   |         | $a = b = 38.7246 \text{ \AA}$ , $c = 3.2531 \text{ \AA}$ ,<br>$\alpha = \beta = 90^\circ$ $\gamma = 120^\circ$ |       |
| Pawley refinement    |         | $R\omega p = 4.98 \%$ and $R_p = 3.87 \%$                                                                      |       |
| Atom                 | x       | y                                                                                                              | z     |
| C1                   | 0.31524 | 0.62643                                                                                                        | 0.000 |
| C2                   | 0.35573 | 0.64836                                                                                                        | 0.000 |
| C3                   | 0.37926 | 0.62913                                                                                                        | 0.000 |
| C4                   | 0.41981 | 0.65109                                                                                                        | 0.000 |
| C5                   | 0.44203 | 0.63298                                                                                                        | 0.000 |
| C6                   | 0.42413 | 0.59266                                                                                                        | 0.000 |
| C7                   | 0.38359 | 0.5705                                                                                                         | 0.000 |
| C8                   | 0.3614  | 0.58863                                                                                                        | 0.000 |
| N9                   | 0.44772 | 0.57499                                                                                                        | 0.000 |
| C10                  | 0.43357 | 0.53787                                                                                                        | 0.000 |
| C11                  | 0.45882 | 0.52107                                                                                                        | 0.000 |
| C12                  | 0.49902 | 0.5433                                                                                                         | 0.000 |
| C13                  | 0.48642 | 0.48122                                                                                                        | 0.000 |
| S14                  | 0.43995 | 0.47161                                                                                                        | 0.000 |
| H15                  | 0.30014 | 0.5935                                                                                                         | 0.000 |
| H16                  | 0.43459 | 0.68401                                                                                                        | 0.000 |
| H17                  | 0.47494 | 0.65111                                                                                                        | 0.000 |
| H18                  | 0.36866 | 0.53758                                                                                                        | 0.000 |
| H19                  | 0.32848 | 0.57051                                                                                                        | 0.000 |
| H20                  | 0.4009  | 0.51766                                                                                                        | 0.000 |
| H21                  | 0.51373 | 0.57621                                                                                                        | 0.000 |

## Section S6. References

- [1] E. Skúlason, V. Tripkovic, M. E. Björketun, S. Gudmundsdóttir, G. Karlberg, J. Rossmeisl, T. Bligaard, H. Jónsson and J. K. Nørskov, *J. Phys. Chem. C*, **2010**, 114, 18182-18197.
- [2] M. Chhetri, S. Maitra, H. Chakraborty, U. V. Waghmare, C. N. R. Rao, *Energy Environ. Sci.* **2016**, 9, 95-101.
